# Supplementary material for: Improvement Research Priorities: USA Survey and Expert Consensus
Source: PubMed Central journal article supplement (PMC3759273; doi:10.1155/2013/695729), 2013-08-18
Supplement: 695729.f1.pdf [file 695729.f1.pdf]

[Electronic Appendix]

Survey to Set Research Priorities for Improvement Science

INTRODUCTION TO SURVEY

Survey to Set Research Priorities for Improvement Science Copyright Stevens, 2011 Reprinted with permission.

This survey was used to gather stakeholder input to establish consensus on research priorities in improvement science. The survey contains 33 improvement topics organized into 9 categories using a Likert scale of 1 to 4 on the construct of "importance." It was designed from stakeholder input and systematically refined to be used online. Items and categories were initially identified from an environmental scan to identify improvement topics and categories.

Improvement science holds great promise for improving patient care, outcomes, and system efficiencies and thus it is important to increase the quantity and quality of improvement research.

We are seeking your recommendations as a researcher, academician, clinician, or administrator on priorities for improvement research.

1. In your opinion, how important is it to study each of the following improvement strategies?

| Improvement Strategies                                                                             | Not important at all       | Somewhat important         | Important                  | Very important             |
|----------------------------------------------------------------------------------------------------|----------------------------|----------------------------|----------------------------|----------------------------|
| Process Improvement in Clinical Care                                                               |                            |                            |                            |                            |
| Evidence-based practice in clinical care                                                           | <input type="checkbox"/> 1 | <input type="checkbox"/> 2 | <input type="checkbox"/> 3 | <input type="checkbox"/> 4 |
| Integration of best practices into clinical routines                                               | <input type="checkbox"/> 1 | <input type="checkbox"/> 2 | <input type="checkbox"/> 3 | <input type="checkbox"/> 4 |
| Checklists and other care improvement tools                                                        | <input type="checkbox"/> 1 | <input type="checkbox"/> 2 | <input type="checkbox"/> 3 | <input type="checkbox"/> 4 |
| Process improvement techniques and tools (e.g., Plan-Do-Study-Act, root cause analysis, Six Sigma) | <input type="checkbox"/> 1 | <input type="checkbox"/> 2 | <input type="checkbox"/> 3 | <input type="checkbox"/> 4 |
| Systems and Microsystems                                                                           |                            |                            |                            |                            |
| Workplace environment and quality improvement                                                      | <input type="checkbox"/> 1 | <input type="checkbox"/> 2 | <input type="checkbox"/> 3 | <input type="checkbox"/> 4 |
| Climates for change and learning organizations                                                     | <input type="checkbox"/> 1 | <input type="checkbox"/> 2 | <input type="checkbox"/> 3 | <input type="checkbox"/> 4 |

|                                                |                            |                            |                            |                            |
|------------------------------------------------|----------------------------|----------------------------|----------------------------|----------------------------|
| Innovation for improvement                     | <input type="checkbox"/> 1 | <input type="checkbox"/> 2 | <input type="checkbox"/> 3 | <input type="checkbox"/> 4 |
| Adoption of best practices (hardwiring change) | <input type="checkbox"/> 1 | <input type="checkbox"/> 2 | <input type="checkbox"/> 3 | <input type="checkbox"/> 4 |

|                                                                                                                              |                            |                            |                            |                            |
|------------------------------------------------------------------------------------------------------------------------------|----------------------------|----------------------------|----------------------------|----------------------------|
| High-reliability organization concepts in acute care settings                                                                | <input type="checkbox"/> 1 | <input type="checkbox"/> 2 | <input type="checkbox"/> 3 | <input type="checkbox"/> 4 |
| Patient Safety                                                                                                               |                            |                            |                            |                            |
| Culture of patient safety (e.g., shared willingness to report and learn from errors, open communication, leadership support) | <input type="checkbox"/> 1 | <input type="checkbox"/> 2 | <input type="checkbox"/> 3 | <input type="checkbox"/> 4 |
| Prevention of targeted patient safety incidents (e.g., falls, medication errors)                                             | <input type="checkbox"/> 1 | <input type="checkbox"/> 2 | <input type="checkbox"/> 3 | <input type="checkbox"/> 4 |
| Patient Centered Care                                                                                                        |                            |                            |                            |                            |
| Patient and family activation and engagement                                                                                 | <input type="checkbox"/> 1 | <input type="checkbox"/> 2 | <input type="checkbox"/> 3 | <input type="checkbox"/> 4 |
| Patient-centered care and patient advocacy                                                                                   | <input type="checkbox"/> 1 | <input type="checkbox"/> 2 | <input type="checkbox"/> 3 | <input type="checkbox"/> 4 |
| Care Coordination                                                                                                            |                            |                            |                            |                            |
| Handoffs and transitions <u>within</u> the hospital                                                                          | <input type="checkbox"/> 1 | <input type="checkbox"/> 2 | <input type="checkbox"/> 3 | <input type="checkbox"/> 4 |
| Handoffs and transitions <u>across</u> healthcare settings                                                                   | <input type="checkbox"/> 1 | <input type="checkbox"/> 2 | <input type="checkbox"/> 3 | <input type="checkbox"/> 4 |
| Quality Indicators (e.g., performance and outcome measures)                                                                  |                            |                            |                            |                            |
| Quality indicator sets (e.g., <i>National Database of Nursing Quality Indicators</i> )                                       | <input type="checkbox"/> 1 | <input type="checkbox"/> 2 | <input type="checkbox"/> 3 | <input type="checkbox"/> 4 |
| Reliable metrics for measuring improvement                                                                                   | <input type="checkbox"/> 1 | <input type="checkbox"/> 2 | <input type="checkbox"/> 3 | <input type="checkbox"/> 4 |
| Reports to the public on quality and safety (transparency)                                                                   | <input type="checkbox"/> 1 | <input type="checkbox"/> 2 | <input type="checkbox"/> 3 | <input type="checkbox"/> 4 |
| Feedback and dashboards to guide performance                                                                                 | <input type="checkbox"/> 1 | <input type="checkbox"/> 2 | <input type="checkbox"/> 3 | <input type="checkbox"/> 4 |
| Baseline and follow up measures to assess impact of improvement                                                              | <input type="checkbox"/> 1 | <input type="checkbox"/> 2 | <input type="checkbox"/> 3 | <input type="checkbox"/> 4 |
| Measurement of total system processes                                                                                        | <input type="checkbox"/> 1 | <input type="checkbox"/> 2 | <input type="checkbox"/> 3 | <input type="checkbox"/> 4 |
| Policy, Regulation, and Recognition Programs                                                                                 |                            |                            |                            |                            |
| Impact of healthcare policy issues (e.g., public reporting, pay for performance)                                             | <input type="checkbox"/> 1 | <input type="checkbox"/> 2 | <input type="checkbox"/> 3 | <input type="checkbox"/> 4 |
| Economic impact of improvement processes                                                                                     | <input type="checkbox"/> 1 | <input type="checkbox"/> 2 | <input type="checkbox"/> 3 | <input type="checkbox"/> 4 |

|                                                                                                 |                            |                            |                            |                            |
|-------------------------------------------------------------------------------------------------|----------------------------|----------------------------|----------------------------|----------------------------|
|                                                                                                 |                            |                            |                            |                            |
| Programs of excellence impact on patient outcomes (e.g., Magnet Recognition)                    | <input type="checkbox"/> 1 | <input type="checkbox"/> 2 | <input type="checkbox"/> 3 | <input type="checkbox"/> 4 |
| Economic impact of healthcare regulations on costs and outcomes                                 | <input type="checkbox"/> 1 | <input type="checkbox"/> 2 | <input type="checkbox"/> 3 | <input type="checkbox"/> 4 |
| Workforce Preparation and Competencies                                                          |                            |                            |                            |                            |
| New competencies for quality improvement and patient safety                                     | <input type="checkbox"/> 1 | <input type="checkbox"/> 2 | <input type="checkbox"/> 3 | <input type="checkbox"/> 4 |
| Redesign of clinical roles (e.g., clinical nurse leaders)                                       | <input type="checkbox"/> 1 | <input type="checkbox"/> 2 | <input type="checkbox"/> 3 | <input type="checkbox"/> 4 |
| Appropriate staffing levels                                                                     | <input type="checkbox"/> 1 | <input type="checkbox"/> 2 | <input type="checkbox"/> 3 | <input type="checkbox"/> 4 |
| Frontline provider engagement in quality and safety (e.g., Transforming Care at the Bedside)    | <input type="checkbox"/> 1 | <input type="checkbox"/> 2 | <input type="checkbox"/> 3 | <input type="checkbox"/> 4 |
| Team performance and interprofessional communication (e.g., standardized team training)         | <input type="checkbox"/> 1 | <input type="checkbox"/> 2 | <input type="checkbox"/> 3 | <input type="checkbox"/> 4 |
| Disruptive behavior management                                                                  | <input type="checkbox"/> 1 | <input type="checkbox"/> 2 | <input type="checkbox"/> 3 | <input type="checkbox"/> 4 |
| Technology                                                                                      |                            |                            |                            |                            |
| Technology applications in clinical care (e.g., electronic decision support tools, smart pumps) | <input type="checkbox"/> 1 | <input type="checkbox"/> 2 | <input type="checkbox"/> 3 | <input type="checkbox"/> 4 |
| Integration of technology applications into clinical care                                       | <input type="checkbox"/> 1 | <input type="checkbox"/> 2 | <input type="checkbox"/> 3 | <input type="checkbox"/> 4 |

2. List other improvement strategies that are important to study.

- a.
- b.
- c.

3. A national collaboration for improvement research is developing. In your opinion, what are the most important resources and supports that it should provide?

## About Your Organization

Indicate typical characteristics of your work environment or affiliation by indicating your agreement with the following statements:

| In my Work Environment/Affiliation...                                                      | Strongly Disagree          | Disagree                   | Agree                      | Strongly Agree             |
|--------------------------------------------------------------------------------------------|----------------------------|----------------------------|----------------------------|----------------------------|
| The actions of leaders show that patient safety and quality improvement are top priorities | <input type="checkbox"/> 1 | <input type="checkbox"/> 2 | <input type="checkbox"/> 3 | <input type="checkbox"/> 4 |
| Health care professionals are expected to improve processes and systems of care            | <input type="checkbox"/> 1 | <input type="checkbox"/> 2 | <input type="checkbox"/> 3 | <input type="checkbox"/> 4 |
| Clinicians engage in quality improvement and patient safety strategies in their daily work | <input type="checkbox"/> 1 | <input type="checkbox"/> 2 | <input type="checkbox"/> 3 | <input type="checkbox"/> 4 |
| Clinical staff feel free to suggest changes and new programs                               | <input type="checkbox"/> 1 | <input type="checkbox"/> 2 | <input type="checkbox"/> 3 | <input type="checkbox"/> 4 |

## About You

|                                                                                                                                         |                                                                                                                                                               |
|-----------------------------------------------------------------------------------------------------------------------------------------|---------------------------------------------------------------------------------------------------------------------------------------------------------------|
| <p>1. Career Experience as Health Professional</p> <p><input type="checkbox"/> Less than 1 year</p> <p><input type="checkbox"/> 1-5</p> | <p>2. Type of position (<i>Mark all that apply</i>)</p> <p><input type="checkbox"/> Frontline Clinician</p> <p><input type="checkbox"/> Educator-Clinical</p> |
|-----------------------------------------------------------------------------------------------------------------------------------------|---------------------------------------------------------------------------------------------------------------------------------------------------------------|

|                                                                                                                                                                                                                         |                                                                                                                                                                                                                                                                                                                                                               |
|-------------------------------------------------------------------------------------------------------------------------------------------------------------------------------------------------------------------------|---------------------------------------------------------------------------------------------------------------------------------------------------------------------------------------------------------------------------------------------------------------------------------------------------------------------------------------------------------------|
| <input type="checkbox"/> 6-10<br><input type="checkbox"/> 11-15<br><input type="checkbox"/> 16-20<br><input type="checkbox"/> More than 20                                                                              | <input type="checkbox"/> Faculty-Academic<br><input type="checkbox"/> Researcher/Scientist<br><input type="checkbox"/> Administrator<br><input type="checkbox"/> Mid-level Manager<br><input type="checkbox"/> Supervisor/Coordinator<br><input type="checkbox"/> Unit Manager<br><input type="checkbox"/> Consultant<br><input type="checkbox"/> Other _____ |
| <p>3. Does your hospital have Magnet Recognition Status?</p> <input type="checkbox"/> Yes<br><input type="checkbox"/> No<br><input type="checkbox"/> Application in progress<br><input type="checkbox"/> Not Applicable | <p>4. Highest level of Education</p> <input type="checkbox"/> Bachelors degree<br><input type="checkbox"/> Masters degree<br><input type="checkbox"/> Doctorate degree<br><input type="checkbox"/> Medical doctorate<br><input type="checkbox"/> Other _____                                                                                                  |

Thank you for your valuable input.
